# Supplementary material
Source: PubMed Central journal article supplement (PMC10513017)
Supplement: pn9-1-e00017-s001.pdf [file pn9-1-e00017-s001.pdf]

## Supplementary Tables and Figures

**Supplementary Table 1. Associations of maternal overweight or obesity and smoking on child's SGA/LGA risks.**

| Maternal OWO status             | Smoking status     | N (total = 2351) | Number of SGA children (%) | OR(95%CI)       | Number of LGA children (%) | OR(95%CI)       |
|---------------------------------|--------------------|------------------|----------------------------|-----------------|----------------------------|-----------------|
| Individual associations         |                    |                  |                            |                 |                            |                 |
| nonOWO                          |                    | 1109(0.47)       | 180(0.16)                  | Referent        | 78(0.07)                   | Referent        |
| OWO                             |                    | 1242(0.53)       | 114(0.09)                  | 0.60(0.46-0.77) | 150(0.121)                 | 1.52(1.13-2.05) |
|                                 | non-smoking        | 1930(0.82)       | 213(0.11)                  | Referent        | 198(0.10)                  | Referent        |
|                                 | quit-smoking       | 188(0.08)        | 18(0.10)                   | 0.79(0.47-1.33) | 16(0.085)                  | 0.82(0.48-1.42) |
|                                 | continuous-smoking | 233(0.10)        | 63(0.27)                   | 3.39(2.35-4.90) | 14(0.060)                  | 0.68(0.37-1.23) |
|                                 | BMI/IQR            | 2351(1.00)       | 294(0.13)                  | 0.75(0.63-0.89) | 228(0.097)                 | 1.36(1.18-1.57) |
| Joint associations              |                    |                  |                            |                 |                            |                 |
| nonOWO                          | non-smoking        | 927(0.39)        | 129(0.14)                  | Referent        | 68(0.07)                   | Referent        |
| nonOWO                          | quit-smoking       | 75(0.03)         | 12(0.16)                   | 1.10(0.56-2.13) | 5(0.067)                   | 0.95(0.36-2.48) |
| nonOWO                          | continuous-smoking | 107(0.05)        | 39(0.36)                   | 4.30(2.62-7.04) | 5(0.047)                   | 0.86(0.32-2.28) |
| OWO                             | non-smoking        | 1003(0.43)       | 84(0.08)                   | 0.67(0.50-0.91) | 130(0.130)                 | 1.61(1.17-2.22) |
| OWO                             | quit-smoking       | 113(0.05)        | 6(0.05)                    | 0.38(0.16-0.89) | 11(0.097)                  | 1.17(0.59-2.31) |
| OWO                             | continuous-smoking | 126(0.05)        | 24(0.19)                   | 1.84(1.10-3.08) | 9(0.071)                   | 0.95(0.45-2.01) |
| p for interaction (OWO*smoking) |                    |                  | 0.224                      |                 | 0.647                      |                 |

Notes: All samples are considered. SGA and LGA samples are compared to AGA. Models were adjusted for maternal age at delivery, race, education, parity, perceived stress during pregnancy, child age, breastfeeding, gestational or preexisting diabetes.

**Supplementary Table 2. Maternal overweight or obesity and smoking associations on child's overweight or obesity, stratified by sex.**

| Maternal OWO status             | Smoking status     | Number of female children (total =1174) | Number of overweight children (%) | OR(95%CI)       | Number of obese children (%) | OR(95%CI)       |
|---------------------------------|--------------------|-----------------------------------------|-----------------------------------|-----------------|------------------------------|-----------------|
| Individual associations         |                    |                                         |                                   |                 |                              |                 |
| nonOWO                          |                    | 553(0.47)                               | 86(0.16)                          | Referent        | 90(0.16)                     | Referent        |
| OWO                             |                    | 621(0.53)                               | 109(0.18)                         | 1.68(1.20-2.35) | 238(0.383)                   | 3.52(2.61-4.75) |
|                                 | non-smoking        | 969(0.83)                               | 167(0.17)                         | Referent        | 261(0.27)                    | Referent        |
|                                 | quit-smoking       | 94(0.08)                                | 14(0.15)                          | 0.95(0.50-1.78) | 31(0.330)                    | 1.27(0.78-2.06) |
|                                 | continuous-smoking | 111(0.09)                               | 14(0.13)                          | 0.71(0.37-1.36) | 36(0.324)                    | 1.16(0.72-1.87) |
|                                 | BMI/IQR            | 1174(1.00)                              | 195(0.17)                         | 1.45(1.17-1.79) | 328(0.279)                   | 2.20(1.85-2.62) |
| Joint associations              |                    |                                         |                                   |                 |                              |                 |
| nonOWO                          | non-smoking        | 474(0.40)                               | 74(0.16)                          | Referent        | 76(0.16)                     | Referent        |
| nonOWO                          | quit-smoking       | 33(0.03)                                | 3(0.09)                           | 0.53(0.15-1.84) | 7(0.212)                     | 1.15(0.47-2.82) |
| nonOWO                          | continuous-smoking | 46(0.04)                                | 9(0.20)                           | 1.25(0.54-2.88) | 7(0.152)                     | 1.00(0.41-2.44) |
| OWO                             | non-smoking        | 495(0.42)                               | 93(0.19)                          | 1.77(1.23-2.56) | 185(0.374)                   | 3.50(2.52-4.87) |
| OWO                             | quit-smoking       | 61(0.05)                                | 11(0.18)                          | 1.89(0.88-4.05) | 24(0.393)                    | 3.84(2.06-7.15) |
| OWO                             | continuous-smoking | 65(0.06)                                | 5(0.08)                           | 0.67(0.25-1.84) | 29(0.446)                    | 3.75(2.05-6.85) |
| p for interaction (OWO*smoking) |                    |                                         | 0.347                             |                 | 0.935                        |                 |

| Maternal OWO status     | Smoking status     | Number of male children (total = 1177) | Number of overweight children (%) | OR(95%CI)       | Number of obese children (%) | OR(95%CI)       |
|-------------------------|--------------------|----------------------------------------|-----------------------------------|-----------------|------------------------------|-----------------|
| Individual associations |                    |                                        |                                   |                 |                              |                 |
| nonOWO                  |                    | 556(0.47)                              | 90(0.16)                          | Referent        | 111(0.20)                    | Referent        |
| OWO                     |                    | 621(0.53)                              | 115(0.19)                         | 1.54(1.11-2.14) | 223(0.359)                   | 2.65(1.98-3.54) |
|                         | non-smoking        | 961(0.82)                              | 164(0.17)                         | Referent        | 266(0.28)                    | Referent        |
|                         | quit-smoking       | 94(0.08)                               | 13(0.14)                          | 0.82(0.42-1.59) | 30(0.319)                    | 1.17(0.72-1.91) |
|                         | continuous-smoking | 122(0.10)                              | 28(0.23)                          | 1.87(1.10-3.18) | 38(0.311)                    | 1.40(0.87-2.26) |
|                         | BMI/IQR            | 1177(1.00)                             | 205(0.17)                         | 1.49(1.19-1.86) | 334(0.284)                   | 2.27(1.88-2.74) |
| Joint associations      |                    |                                        |                                   |                 |                              |                 |

|                                 |                    |           |          |                 |            |                 |
|---------------------------------|--------------------|-----------|----------|-----------------|------------|-----------------|
| nonOWO                          | non-smoking        | 453(0.38) | 70(0.15) | Referent        | 89(0.20)   | Referent        |
| nonOWO                          | quit-smoking       | 42(0.04)  | 5(0.12)  | 0.84(0.31-2.29) | 8(0.190)   | 0.89(0.39-2.05) |
| nonOWO                          | continuous-smoking | 61(0.05)  | 15(0.25) | 2.44(1.18-5.03) | 14(0.230)  | 1.50(0.73-3.08) |
| OWO                             | non-smoking        | 508(0.43) | 94(0.19) | 1.66(1.15-2.39) | 177(0.348) | 2.59(1.88-3.57) |
| OWO                             | quit-smoking       | 52(0.04)  | 8(0.15)  | 1.38(0.57-3.37) | 22(0.423)  | 3.48(1.80-6.73) |
| OWO                             | continuous-smoking | 61(0.05)  | 13(0.21) | 2.51(1.19-5.32) | 24(0.393)  | 3.61(1.90-6.86) |
| p for interaction (OWO*smoking) |                    |           | 0.993    |                 | 0.44       |                 |

Notes: Models were adjusted for maternal age at delivery, race, education, parity, perceived stress during pregnancy, child age, breastfeeding, gestational or preexisting diabetes.

**Supplementary Table 3. Maternal overweight or obesity and smoking associations on child's overweight or obesity, stratified by term/preterm.**

| Maternal OWO status             | Smoking status     | Number of term-birth children (total = 1708) | Number of overweight children (%) | OR(95%CI)       | Number of obese children (%) | OR(95%CI)       |
|---------------------------------|--------------------|----------------------------------------------|-----------------------------------|-----------------|------------------------------|-----------------|
| Individual associations         |                    |                                              |                                   |                 |                              |                 |
| nonOWO                          |                    | 825(0.48)                                    | 134(0.16)                         | Referent        | 150(0.18)                    | Referent        |
| OWO                             |                    | 883(0.52)                                    | 172(0.19)                         | 1.72(1.31-2.26) | 330(0.374)                   | 3.11(2.44-3.96) |
|                                 | non-smoking        | 1445(0.85)                                   | 261(0.18)                         | Referent        | 393(0.27)                    | Referent        |
|                                 | quit-smoking       | 115(0.07)                                    | 15(0.13)                          | 0.86(0.47-1.57) | 44(0.383)                    | 1.57(1.03-2.41) |
|                                 | continuous-smoking | 148(0.09)                                    | 30(0.20)                          | 1.24(0.77-2.00) | 43(0.291)                    | 1.12(0.74-1.71) |
| Joint associations              |                    |                                              |                                   |                 |                              |                 |
| nonOWO                          | non-smoking        | 718(0.42)                                    | 114(0.16)                         | Referent        | 129(0.18)                    | Referent        |
| nonOWO                          | quit-smoking       | 40(0.02)                                     | 4(0.10)                           | 0.69(0.23-2.05) | 10(0.250)                    | 1.34(0.62-2.90) |
| nonOWO                          | continuous-smoking | 67(0.04)                                     | 16(0.24)                          | 1.67(0.87-3.20) | 11(0.164)                    | 1.00(0.48-2.06) |
| OWO                             | non-smoking        | 727(0.43)                                    | 147(0.20)                         | 1.82(1.36-2.44) | 264(0.363)                   | 3.04(2.34-3.96) |
| OWO                             | quit-smoking       | 75(0.04)                                     | 11(0.15)                          | 1.52(0.73-3.15) | 34(0.453)                    | 4.10(2.39-7.02) |
| OWO                             | continuous-smoking | 81(0.05)                                     | 14(0.17)                          | 1.71(0.86-3.36) | 32(0.395)                    | 3.37(1.96-5.81) |
| p for interaction (OWO*smoking) |                    | 0.782                                        |                                   | 0.994           |                              |                 |

| Maternal OWO status             | Smoking status     | Number of preterm-birth children (total=643) | Number of overweight children (%) | OR(95%CI)       | Number of obese children (%) | OR(95%CI)       |
|---------------------------------|--------------------|----------------------------------------------|-----------------------------------|-----------------|------------------------------|-----------------|
| Individual associations         |                    |                                              |                                   |                 |                              |                 |
| nonOWO                          |                    | 284(0.44)                                    | 42(0.15)                          | Referent        | 51(0.18)                     | Referent        |
| OWO                             |                    | 359(0.56)                                    | 52(0.14)                          | 1.28(0.80-2.07) | 131(0.365)                   | 2.83(1.89-4.24) |
|                                 | non-smoking        | 485(0.75)                                    | 70(0.14)                          | Referent        | 134(0.28)                    | Referent        |
|                                 | quit-smoking       | 73(0.11)                                     | 12(0.16)                          | 1.06(0.53-2.16) | 17(0.233)                    | 0.82(0.45-1.52) |
|                                 | continuous-smoking | 85(0.13)                                     | 12(0.14)                          | 1.32(0.62-2.82) | 31(0.365)                    | 1.72(0.97-3.06) |
| Joint associations              |                    |                                              |                                   |                 |                              |                 |
| nonOWO                          | non-smoking        | 209(0.33)                                    | 30(0.14)                          | Referent        | 36(0.17)                     | Referent        |
| nonOWO                          | quit-smoking       | 35(0.05)                                     | 4(0.11)                           | 0.75(0.24-2.35) | 5(0.143)                     | 0.82(0.29-2.32) |
| nonOWO                          | continuous-smoking | 40(0.06)                                     | 8(0.20)                           | 2.24(0.83-6.03) | 10(0.250)                    | 2.27(0.91-5.61) |
| OWO                             | non-smoking        | 276(0.43)                                    | 40(0.14)                          | 1.38(0.79-2.40) | 98(0.355)                    | 2.98(1.86-4.79) |
| OWO                             | quit-smoking       | 38(0.06)                                     | 8(0.21)                           | 2.00(0.77-5.17) | 12(0.316)                    | 2.77(1.19-6.44) |
| OWO                             | continuous-smoking | 45(0.07)                                     | 4(0.09)                           | 1.01(0.31-3.28) | 21(0.467)                    | 4.43(2.06-9.54) |
| p for interaction (OWO*smoking) |                    | 0.378                                        |                                   | 0.845           |                              |                 |

Notes: Models were adjusted for maternal age at delivery, race, education, parity, perceived stress during pregnancy, child age, breastfeeding, gestational or preexisting diabetes.

**Supplementary Table 4. Maternal overweight or obesity and smoking associations on child's overweight or obesity<sup>a</sup>.**

| Maternal OWO status     | Smoking status | Number of children (total = 2351) | Number of overweight children (%) | OR(95%CI)       | Number of obese children (%) | OR(95%CI)       |
|-------------------------|----------------|-----------------------------------|-----------------------------------|-----------------|------------------------------|-----------------|
| Individual associations |                |                                   |                                   |                 |                              |                 |
| nonOWO                  |                | 1109(0.47)                        | 176(0.16)                         | Referent        | 201(0.18)                    | Referent        |
| OWO                     |                | 1242(0.53)                        | 224(0.18)                         | 1.59(1.26-2.01) | 461(0.371)                   | 2.87(2.33-3.54) |
|                         | non-smoking    | 1930(0.82)                        | 331(0.17)                         | Referent        | 527(0.27)                    | Referent        |

|                                 |                    |            |           |                 |            |                 |
|---------------------------------|--------------------|------------|-----------|-----------------|------------|-----------------|
|                                 | quit-smoking       | 188(0.08)  | 27(0.14)  | 0.90(0.57-1.41) | 61(0.324)  | 1.25(0.88-1.77) |
|                                 | continuous-smoking | 233(0.10)  | 42(0.18)  | 1.26(0.84-1.89) | 74(0.318)  | 1.54(1.09-2.17) |
| Joint associations              |                    |            |           |                 |            |                 |
| nonOWO                          | non-smoking        | 927(0.39)  | 144(0.16) | Referent        | 165(0.18)  | Referent        |
| nonOWO                          | quit-smoking       | 75(0.03)   | 8(0.11)   | 0.69(0.32-1.49) | 15(0.200)  | 1.05(0.57-1.94) |
| nonOWO                          | continuous-smoking | 107(0.05)  | 24(0.22)  | 1.81(1.04-3.12) | 21(0.196)  | 1.57(0.89-2.75) |
| OWO                             | non-smoking        | 1003(0.43) | 187(0.19) | 1.68(1.30-2.17) | 362(0.361) | 2.85(2.26-3.59) |
| OWO                             | quit-smoking       | 113(0.05)  | 19(0.17)  | 1.66(0.94-2.95) | 46(0.407)  | 3.50(2.22-5.50) |
| OWO                             | continuous-smoking | 126(0.05)  | 18(0.14)  | 1.47(0.82-2.64) | 53(0.421)  | 4.01(2.58-6.25) |
| p for interaction (OWO*smoking) |                    |            | 0.448     |                 | 0.688      |                 |

<sup>a</sup> These results are obtained from models that were further adjusted for fetal growth restriction.

Notes: IQR, interquartile range. Models were adjusted for maternal age at delivery, race, education, parity, perceived stress during pregnancy, child age, breastfeeding, gestational or preexisting diabetes, fetal growth restriction.

**Supplementary Table 5. Associations of maternal overweight or obesity and plasma cotinine levels on child's overweight or obesity.**

| Maternal OWO status     | Cotinine            | Number of male children (total = 660) | Number of overweight children (%) | OR(95%CI)       | Number of obese children (%) | OR(95%CI)       |
|-------------------------|---------------------|---------------------------------------|-----------------------------------|-----------------|------------------------------|-----------------|
| Individual associations |                     |                                       |                                   |                 |                              |                 |
| nonOWO                  |                     | 307(0.47)                             | 40(0.13)                          | Referent        | 64(0.21)                     | Referent        |
| OWO                     |                     | 353(0.53)                             | 54(0.15)                          | 1.58(0.98-2.54) | 129(0.365)                   | 2.43(1.65-3.56) |
|                         | Q1                  | 164(0.25)                             | 25(0.15)                          | Referent        | 41(0.25)                     | Referent        |
|                         | Q2                  | 160(0.24)                             | 19(0.12)                          | 0.75(0.38-1.50) | 44(0.275)                    | 0.98(0.58-1.68) |
|                         | Q3                  | 161(0.24)                             | 18(0.11)                          | 0.74(0.37-1.48) | 49(0.304)                    | 1.21(0.72-2.04) |
|                         | Q4                  | 175(0.27)                             | 32(0.18)                          | 1.89(0.98-3.66) | 59(0.337)                    | 1.78(1.03-3.06) |
|                         | continuous cotinine | 660(1.00)                             | 94(0.14)                          | 1.35(1.05-1.75) | 193(0.292)                   | 1.26(1.04-1.54) |
| Joint associations      |                     |                                       |                                   |                 |                              |                 |
| nonOWO                  | Q1-3                | 227(0.34)                             | 24(0.11)                          | Referent        | 47(0.21)                     | Referent        |
| nonOWO                  | Q4                  | 80(0.12)                              | 16(0.20)                          | 2.87(1.34-6.15) | 17(0.212)                    | 1.24(0.63-2.45) |
| OWO                     | Q1-3                | 258(0.39)                             | 38(0.15)                          | 1.81(1.01-3.25) | 87(0.337)                    | 2.13(1.36-3.32) |
| OWO                     | Q4                  | 95(0.14)                              | 16(0.17)                          | 3.44(1.59-7.43) | 42(0.442)                    | 4.12(2.29-7.42) |

| Maternal OWO status     | Cotinine            | Number of female children (total = 655) | Number of overweight children (%) | OR(95%CI)       | Number of obese children (%) | OR(95%CI)       |
|-------------------------|---------------------|-----------------------------------------|-----------------------------------|-----------------|------------------------------|-----------------|
| Individual associations |                     |                                         |                                   |                 |                              |                 |
| nonOWO                  |                     | 302(0.46)                               | 51(0.17)                          | Referent        | 53(0.18)                     | Referent        |
| OWO                     |                     | 353(0.54)                               | 63(0.18)                          | 1.51(0.96-2.35) | 135(0.382)                   | 3.09(2.07-4.60) |
|                         | Q1                  | 167(0.25)                               | 32(0.19)                          | Referent        | 44(0.26)                     | Referent        |
|                         | Q2                  | 168(0.26)                               | 25(0.15)                          | 0.70(0.38-1.29) | 49(0.292)                    | 0.99(0.59-1.66) |
|                         | Q3                  | 166(0.25)                               | 28(0.17)                          | 0.83(0.45-1.51) | 46(0.277)                    | 0.96(0.57-1.61) |
|                         | Q4                  | 154(0.24)                               | 29(0.19)                          | 1.04(0.55-1.95) | 49(0.318)                    | 1.21(0.70-2.10) |
|                         | continuous cotinine | 655(1.00)                               | 114(0.17)                         | 0.94(0.74-1.19) | 188(0.287)                   | 1.03(0.85-1.26) |
| Joint associations      |                     |                                         |                                   |                 |                              |                 |
| nonOWO                  | Q1-3                | 241(0.37)                               | 41(0.17)                          | Referent        | 40(0.17)                     | Referent        |
| nonOWO                  | Q4                  | 61(0.09)                                | 10(0.16)                          | 0.96(0.43-2.17) | 13(0.213)                    | 1.31(0.62-2.78) |
| OWO                     | Q1-3                | 260(0.40)                               | 44(0.17)                          | 1.36(0.82-2.27) | 99(0.381)                    | 3.18(2.02-5.02) |
| OWO                     | Q4                  | 93(0.14)                                | 19(0.20)                          | 1.92(0.96-3.86) | 36(0.387)                    | 3.59(1.94-6.65) |

Notes: Models were adjusted for maternal age at delivery, race, education, parity, perceived stress during pregnancy, child age, breastfeeding, gestational or preexisting diabetes.

**Supplementary Table 6. Maternal overweight or obesity and cord blood cotinine levels associations on child's overweight or obesity.**

| Maternal OWO status     | Cotinine | Number of male children (total = 484) | Number of overweight children (%) | OR(95%CI)       | Number of obese children (%) | OR(95%CI)       |
|-------------------------|----------|---------------------------------------|-----------------------------------|-----------------|------------------------------|-----------------|
| Individual associations |          |                                       |                                   |                 |                              |                 |
| nonOWO                  |          | 225(0.46)                             | 34(0.15)                          | Referent        | 50(0.22)                     | Referent        |
| OWO                     |          | 259(0.54)                             | 44(0.17)                          | 1.47(0.86-2.52) | 91(0.351)                    | 2.13(1.35-3.35) |

|                    |                     |           |          |                 |            |                 |
|--------------------|---------------------|-----------|----------|-----------------|------------|-----------------|
|                    | Q1                  | 133(0.27) | 21(0.16) | Referent        | 39(0.29)   | Referent        |
|                    | Q2                  | 104(0.21) | 25(0.24) | 1.57(0.78-3.15) | 22(0.212)  | 0.80(0.42-1.53) |
|                    | Q3                  | 118(0.24) | 11(0.09) | 0.60(0.26-1.38) | 39(0.331)  | 1.09(0.60-1.96) |
|                    | Q4                  | 129(0.27) | 21(0.16) | 1.34(0.63-2.84) | 41(0.318)  | 1.27(0.69-2.31) |
|                    | continuous cotinine | 484(1.00) | 78(0.16) | 1.06(0.78-1.43) | 141(0.291) | 1.10(0.86-1.40) |
| Joint associations |                     |           |          |                 |            |                 |
| nonOWO             | Q1-3                | 161(0.33) | 23(0.14) | Referent        | 34(0.21)   | Referent        |
| nonOWO             | Q4                  | 64(0.13)  | 11(0.17) | 1.80(0.75-4.34) | 16(0.250)  | 1.43(0.67-3.06) |
| OWO                | Q1-3                | 194(0.40) | 34(0.18) | 1.73(0.92-3.23) | 66(0.340)  | 2.24(1.32-3.79) |
| OWO                | Q4                  | 65(0.13)  | 10(0.15) | 1.76(0.71-4.34) | 25(0.385)  | 2.73(1.34-5.57) |

| Maternal OWO status     | Cotinine            | Number of female children (total = 409) | Number of overweight children (%) | OR(95%CI)       | Number of obese children (%) | OR(95%CI)       |
|-------------------------|---------------------|-----------------------------------------|-----------------------------------|-----------------|------------------------------|-----------------|
| Individual associations |                     |                                         |                                   |                 |                              |                 |
| nonOWO                  |                     | 196(0.48)                               | 33(0.17)                          | Referent        | 33(0.17)                     | Referent        |
| OWO                     |                     | 213(0.52)                               | 49(0.23)                          | 2.48(1.43-4.29) | 82(0.385)                    | 3.90(2.34-6.50) |
|                         | Q1                  | 106(0.26)                               | 20(0.19)                          | Referent        | 31(0.29)                     | Referent        |
|                         | Q2                  | 104(0.25)                               | 23(0.22)                          | 1.07(0.52-2.22) | 23(0.221)                    | 0.66(0.34-1.30) |
|                         | Q3                  | 105(0.26)                               | 21(0.20)                          | 0.94(0.45-1.95) | 25(0.238)                    | 0.72(0.37-1.39) |
|                         | Q4                  | 94(0.23)                                | 18(0.19)                          | 1.22(0.53-2.78) | 36(0.383)                    | 1.25(0.62-2.49) |
|                         | continuous cotinine | 409(1.00)                               | 82(0.20)                          | 1.12(0.81-1.54) | 115(0.281)                   | 1.03(0.78-1.36) |
| Joint associations      |                     |                                         |                                   |                 |                              |                 |
| nonOWO                  | Q1-3                | 164(0.40)                               | 24(0.15)                          | Referent        | 25(0.15)                     | Referent        |
| nonOWO                  | Q4                  | 32(0.08)                                | 9(0.28)                           | 3.09(1.12-8.54) | 8(0.250)                     | 1.96(0.71-5.43) |
| OWO                     | Q1-3                | 151(0.37)                               | 40(0.26)                          | 3.53(1.90-6.59) | 54(0.358)                    | 4.35(2.41-7.83) |
| OWO                     | Q4                  | 62(0.15)                                | 9(0.15)                           | 1.83(0.71-4.75) | 28(0.452)                    | 4.43(2.07-9.47) |

Notes: Models were adjusted for maternal age at delivery, race, education, parity, perceived stress during pregnancy, child age, breastfeeding, gestational or preexisting diabetes.

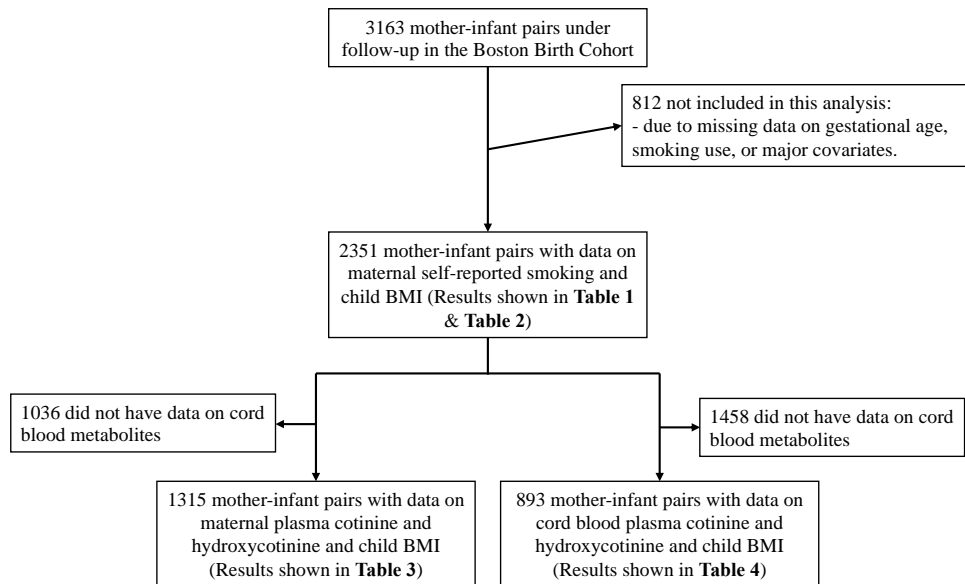

Supplementary Figure 1. Flowchart of the participant selection process for the analysis.

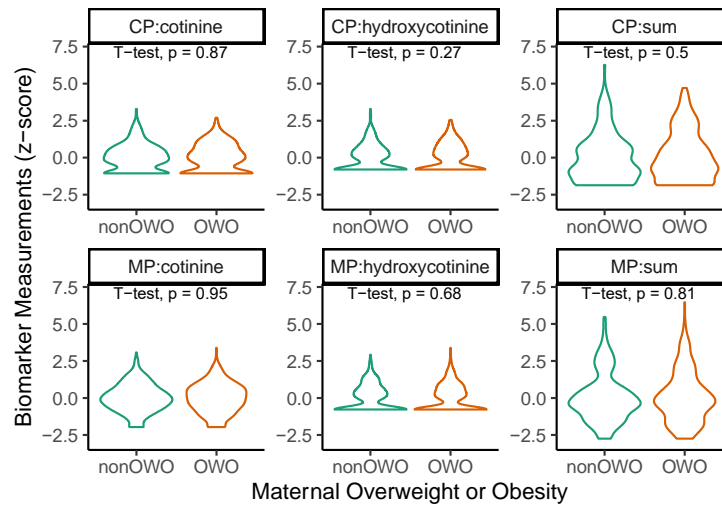

**Supplementary Figure 2. Distribution of cotinine, hydroxycotinine, and their sum in maternal plasma (MP) and cord plasma (CP).**

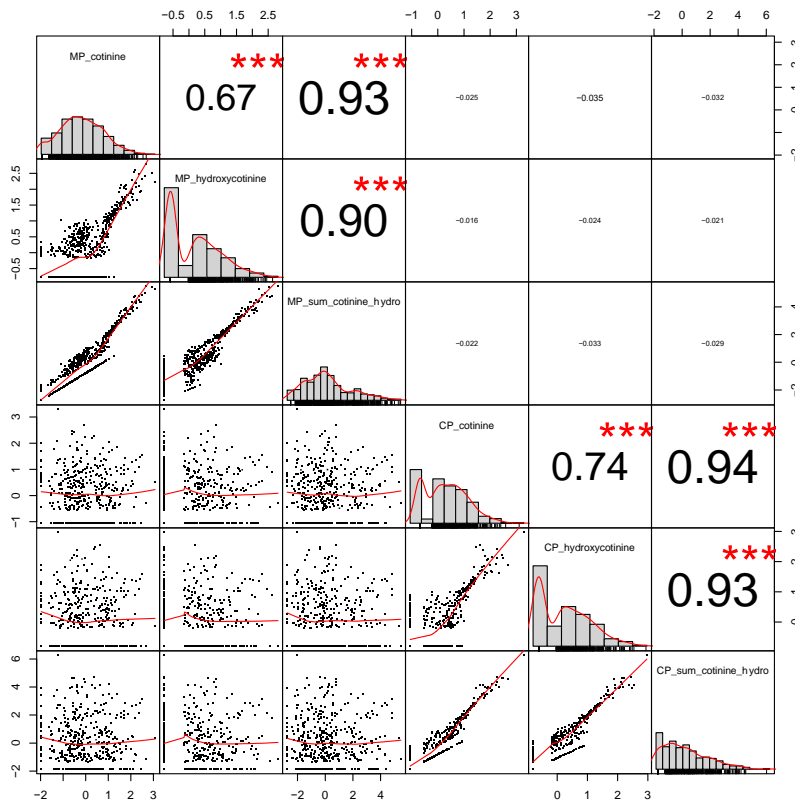

**Supplementary Figure 3. Maternal plasma vs cord plasma biomarkers (cotinine, hydroxycotinine, and sum) loess correlation plot.** Scatterplots show the bivariate z-scores with a red fitted curve. Absolute values of the correlations are starred by the cor.test. (MP: maternal plasma. CP: cord plasma. Sum\_cotinine\_hydro: the sum of cotinine and hydroxycotinine.)

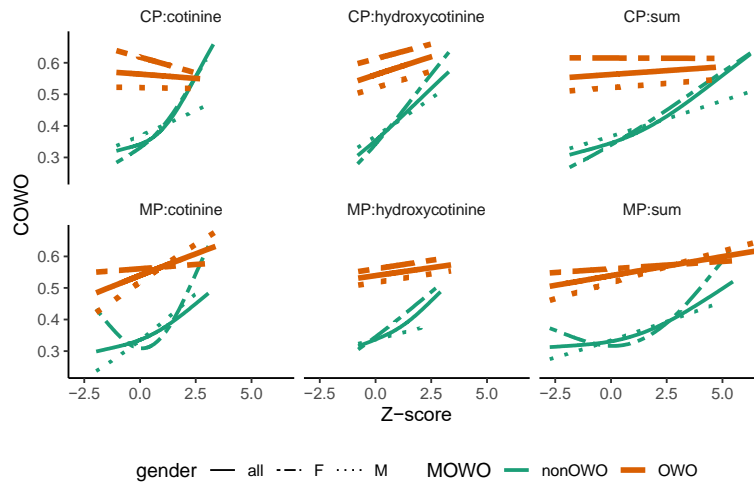

**Supplementary Figure 4. Sex difference of the effects of smoking biomarkers on child’s overweight or obesity risk.** MP, maternal plasma; CP, cord plasma; sum, sum of cotinine and hydroxycotinine; all, all samples; F, female; M, male.

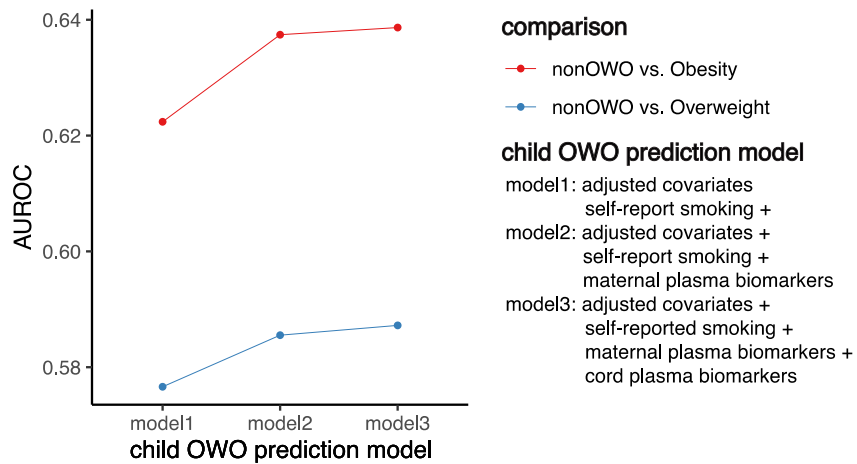

**Supplementary Figure 5. Child’s overweight or obesity prediction performance in three nested models.** All of model1, model2, and model3 are adjusted with pertinent covariates, except that model1 only include self-reported smoking, model2 is based on model1 but add maternal plasma biomarker measurements (cotinine, hydroxycotinine), and model3 is based on model2 but add cord plasma biomarker measurements (cotinine, hydroxycotinine). AUROC = Area Under Receiver Operating Characteristic.
